# Neuropeptide Y Inhibits Spontaneous $\alpha$ -Melanocyte-Stimulating Hormone ( $\alpha$ -MSH) Release via a $Y_5$ Receptor and Suppresses Thyrotropin-Releasing Hormone-Induced $\alpha$ -MSH Secretion via a $Y_1$ Receptor in Frog Melanotrope Cells

LUDOVIC GALAS, MARIE-CHRISTINE TONON, DELPHINE BEAUJEAN\*, ROBERT FREDRIKSSON, DAN LARHAMMAR, ISABELLE LIHRMANN, SYLVIE JEGOU, ALAIN FOURNIER, NICOLAS CHARTREL, AND HUBERT VAUDRY†

European Institute for Peptide Research (IFRMP 23), Laboratory of Cellular and Molecular Neuroendocrinology, INSERM, U-413, UA Centre National de la Recherche Scientifique, University of Rouen (L.G., M.C.T., D.B., I.L., S.J., N.C., H.V.), 76821 Mont-Saint-Aignan, France; Department of Neuroscience, Unit of Pharmacology, Uppsala University (R.F., D.L.) Uppsala, Sweden; Institut National de la Recherche et de la Santé/Institut Armand Frappier, University of Québec (A.F.), Pointe-Claire, Québec, Canada H9R 1G6

In amphibians, the secretion of  $\alpha$ -MSH by melanotrope cells is stimulated by TRH and inhibited by NPY. We have previously shown that NPY abrogates the stimulatory effect of TRH on  $\alpha$ -MSH secretion. The aim of the present study was to characterize the receptor subtypes mediating the action of NPY and to investigate the intracellular mechanisms involved in the inhibitory effect of NPY on basal and TRH-induced  $\alpha$ -MSH secretion.  $Y_1$  and  $Y_5$  receptor mRNAs were detected by RT-PCR and visualized by *in situ* hybridization histochemistry in the intermediate lobe of the pituitary. Various NPY analogs inhibited in a dose-dependent manner the spontaneous secretion of  $\alpha$ -MSH from perfused frog neurointermediate lobes with the following order of potency porcine peptide YY (pPYY) > frog NPY (fNPY) > porcine NPY (pNPY)-2-36 > pNPY-(13-36) > [D-Trp<sup>32</sup>]pNPY > [Leu<sup>31</sup>,Pro<sup>34</sup>]pNPY. The stimulatory effect of TRH ( $10^{-8}$  M) on  $\alpha$ -MSH release was inhibited by fNPY, pPYY, and [Leu<sup>31</sup>,Pro<sup>34</sup>]pNPY, but not by pNPY-(13-36) and [D-Trp<sup>32</sup>]pNPY. These data indicate that the inhibitory effect of fNPY on spontaneous  $\alpha$ -MSH release is preferentially mediated through  $Y_5$  receptors, whereas the suppression of TRH-induced  $\alpha$ -MSH secretion by fNPY prob-

ably involves  $Y_1$  receptors. Pretreatment of neurointermediate lobes with pertussis toxin (PTX; 1  $\mu$ g/ml; 12 h) did not abolish the inhibitory effect of fNPY on cAMP formation and spontaneous  $\alpha$ -MSH release, but restored the stimulatory effect of TRH on  $\alpha$ -MSH secretion, indicating that the adenylyl cyclase pathway is not involved in the action of fNPY on TRH-evoked  $\alpha$ -MSH secretion. In the majority of melanotrope cells, TRH induces a sustained and biphasic increase in cytosolic  $Ca^{2+}$  concentration. Preincubation of cultured cells with fNPY ( $10^{-7}$  M) or  $\omega$ -conotoxin GVIA ( $10^{-7}$  M) suppressed the plateau phase of the  $Ca^{2+}$  response induced by TRH. However, although fNPY abrogated TRH-evoked  $\alpha$ -MSH secretion,  $\omega$ -conotoxin did not, showing dissociation between the cytosolic  $Ca^{2+}$  concentration increase and the secretory response. Collectively, these data indicate that in frog melanotrope cells NPY inhibits spontaneous  $\alpha$ -MSH release and cAMP formation through activation of a  $Y_5$  receptor coupled to PTX-insensitive G protein, whereas NPY suppresses the stimulatory effect of TRH on  $\alpha$ -MSH secretion through a  $Y_1$  receptor coupled to a PTX-sensitive G protein-coupled receptor. (*Endocrinology* 143: 1686–1694, 2002)

IN MOST MAMMALIAN and submammalian vertebrates, the secretion of  $\alpha$ -MSH is regulated by various neurotransmitters, including dopamine, norepinephrine,  $\gamma$ -aminobutyric acid, and acetylcholine (1). In amphibians, the secretory activity of the pars intermedia is also controlled by several neuropeptides (2–4). In particular, the neurointermediate lobe of the frog pituitary is innervated by a dense network of fibers containing TRH (5–7) and NPY (8–12). *In vitro* studies conducted in *Rana ridibunda* and *Xenopus laevis* have shown that TRH is a potent stimulator of  $\alpha$ -MSH secretion (6, 13, 14) and that NPY acts as an  $\alpha$ -MSH release-inhibiting factor (8, 10), suggesting that in amphibians TRH

and NPY may play a pivotal role in the process of skin color adaptation.

The effects of TRH and NPY are both mediated through activation of G protein-coupled receptors. To date, two TRH receptor subtypes and at least five NPY receptor subtypes have been identified in vertebrates (15–21). The various NPY receptor variants can be distinguished on the basis of their differential responses to NPY analogs. The  $Y_1$  receptor subtype is activated by [Leu<sup>31</sup>,Pro<sup>34</sup>]NPY and has low affinity for NPY-(13–36). Conversely, the  $Y_2$  receptor subtype is activated by C-terminal fragments of NPY and does not bind [Leu<sup>31</sup>,Pro<sup>34</sup>]NPY. The  $Y_3$  receptor, in contrast to all other NPY receptor subtypes, exhibits very low affinity for peptide YY (PYY). The  $Y_4$  receptor binds pancreatic polypeptide and [Leu<sup>31</sup>,Pro<sup>34</sup>]NPY. The  $Y_5$  receptor is activated by [Leu<sup>31</sup>,Pro<sup>34</sup>]NPY, N-terminally truncated fragments of NPY [NPY-(2–36), NPY-(13–36), *etc.*], and [D-Trp<sup>32</sup>]NPY. The

Abbreviations: [Ca<sup>2+</sup>]<sub>i</sub>, Cytosolic Ca<sup>2+</sup> concentration; fNPY, frog NPY; pNPY, porcine NPY; pPYY, porcine peptide YY; NIL, neurointermediate lobe; PTX, pertussis toxin; SSC, saline sodium citrate;  $\omega$ -CgTx,  $\omega$ -conotoxin GVIA.

pharmacological profile of the y<sub>6</sub> receptor has not yet been precisely determined and might be species specific (for review, see Refs. 19–22).

In normal and tumoral pituitary cells, TRH stimulates the PLC/PKC pathway and activates calcium membrane channels, leading to an increase in the cytosolic calcium concentration ([Ca<sup>2+</sup>]<sub>i</sub>) (23, 24). Activation of TRH receptors has been reported to also stimulate adenylyl cyclase (25, 26), PLA<sub>2</sub> (27, 28), protein tyrosine kinase (29), Ca<sup>2+</sup>/calmodulin-dependent protein kinase II (30, 31), and MAPK (32, 33). In almost every cell type studied, NPY receptors are negatively coupled to adenylyl cyclase via pertussis toxin-sensitive G proteins (for review, see Ref. 20). In certain cell types, additional signaling responses to NPY include stimulation or inhibition of [Ca<sup>2+</sup>]<sub>i</sub> (34–38) and activation of PLA<sub>2</sub> (39), PKC (40), protein tyrosine kinase (41–43), and MAPK (40, 44).

The intermediate lobe of the frog pituitary, which is composed of a homogeneous population of endocrine cells, represents a valuable alternative model in which to investigate the transduction pathways activated by TRH and NPY in normal cells. The aim of the present study was to determine the receptor subtypes mediating the action of NPY on frog melanotrope cells and to investigate the intracellular mechanisms involved in the inhibitory effect of NPY on basal and TRH-induced α-MSH secretion.

## Materials and Methods

### Animals

Adult male frogs (*R. ridibunda*; 40–50 g) originating from Bulgaria were purchased from a commercial supplier (Couéard, St. Hilaire de Riez, France). The animals were housed in a temperature-controlled room (8 ± 0.5 C) under running water on a 12-h dark/12-h light regimen (lights on from 0600–1800 h). The frogs were killed by decapitation, and the neurointermediate lobes (NILs) were dissected under a microscope. Animal manipulations were performed according to the recommendations of the French ethical committee and under the supervision of authorized investigators.

### Reagents and test substances

SuperScript II reverse transcriptase RNase H<sup>-</sup> and kanamycin were supplied by Life Technologies, Inc. (Cergy Pontoise, France). The *Taq* DNA polymerase was purchased from Promega Corp. (Charbonnières France). Synthetic frog NPY (fNPY), porcine PYY (pPYY), [Leu<sup>31</sup>,Pro<sup>34</sup>]pNPY, pNPY-(2–36), and pNPY-(13–36) were prepared using the solid phase methodology as previously described (45). [D-Trp<sup>32</sup>]pNPY was purchased from Phoenix Pharmaceuticals, Inc. (Mountain View, CA). TRH, ω-conotoxin GVIA (ω-CgTx), pertussis toxin (PTX), Leibovitz culture medium (L15), and collagenase (type IA) were obtained from Sigma (St. Louis, MO). BSA (fraction V) was purchased from Roche (Mannheim, Germany). FBS and the antibiotic-antimycotic solution were obtained from BioWhittaker, Inc. (Gagny, France). Indo-1/acetoxymethyl ester (indo-1/AM) was obtained from Molecular Probes, Inc. (Leiden, The Netherlands). Bio-Gel P2 was purchased from Bio-Rad Laboratories, Inc. (Hercules, CA). All other chemicals were obtained from Sigma.

### RT-PCR

Total RNA was purified from NILs by the acid guanidinium-thiocyanate-phenol-chloroform method of Chomczynski and Sacchi (46) using Tri-Reagent. Approximately 5 μg RNA were reverse transcribed using an oligo(deoxythymidine)<sub>12–18</sub> primer and SuperScript II reverse transcriptase RNase H<sup>-</sup> in the buffer supplied with the enzyme. PCR amplification was performed in a 50-μl volume containing 2 μl reverse transcribed RNA solution, 200 μM dNTPs, 1 mM MgCl<sub>2</sub>, 1 U *Taq* DNA

polymerase, and 20 pmol sense and antisense primers specific for each *R. ridibunda* NPY receptor subtype (Y<sub>1</sub> forward, 5'-TGG ATT TTT GGA GTT GGT ATG TGT A-3'; Y<sub>1</sub> reverse, 5'-AAC GGC AAT GAG AAC CAG TGA GAA A-3'; Y<sub>2</sub> forward, 5'-TAT GCG GAC GGT GAC GAA CTA-3'; Y<sub>2</sub> reverse, 5'-CCA CCA TCA TCA CCA ACA TCT-3'; Y<sub>5</sub> forward, 5'-CAT ATT GCC CTG TCC TGT TTA-3'; Y<sub>5</sub> reverse, 5'-AGA CCG AAT TCA TGT TGC TCA-3'; y<sub>6</sub> forward, 5'-ACC GTG TGC AAA CTC GCT TCC-3'; y<sub>6</sub> reverse, 5'-CTT GCA TTT CCT CAC TTC CTG TCT-3') in 5 μl of the buffer (pH 9.0) supplied with the enzyme for 40 cycles (40 sec at 94 C, 1 min at 50 C, and 1 min and 30 sec at 72 C) in a Robocycler Gradient 40 (Stratagene, La Jolla, CA). The PCR products were separated on a 2% agarose gel and transferred onto Hybond-N membrane (Amersham Pharmacia Biotech, Les Ulis, France). The membranes were prehybridized for 4 h at 42 C in a solution containing 5× saline sodium citrate (SSC), 0.1× SDS, 10× Denhardt's solution, and 50 μg/ml denatured salmon sperm DNA. Hybridization was performed overnight at 42 C in a solution containing 5× salt sodium phosphate EDTA buffer and 1× SDS in the presence of the <sup>32</sup>P-labeled NPY receptor probe. The membranes were washed twice in 5× salt sodium phosphate EDTA buffer/0.1% SDS at 42 C and exposed on Kodak X-OMAT films (Rochester, NY).

### In situ hybridization histochemistry

*In situ* hybridization was performed as previously described (47). Briefly, adult male frogs were anesthetized and perfused transcardially with 4% paraformaldehyde. Pituitary sections (12 μm thick) were cut on a cryostat and mounted on poly-L-lysine- and gelatin-coated slides. The partial NPY receptor cDNA sequences were subcloned into pGEMT between *SpeI* and *NcoI* sites, and sense and antisense riboprobes were generated with T7 and SP6 polymerases in the presence of [<sup>35</sup>S]UTP. Sections were incubated for 10 min in 0.1 M triethanolamine/0.9% NaCl (pH 8.0)/0.25 acetic anhydride, rinsed in 2× SSC, and covered for 60 min with prehybridization buffer (pH 7.5) containing 50% formamide, 0.6 M NaCl, 10 mM Tris-HCl (pH 7.5), 0.02% Ficoll, 0.02% polyvinylpyrrolidone, 0.02% BSA, 1 mM EDTA (pH 8.0), 550 μg/ml denatured salmon sperm DNA, and 50 μg/ml yeast tRNA. Hybridization was performed overnight at 40 C for the Y<sub>1</sub> receptor and at 50 C for the Y<sub>2</sub>, Y<sub>5</sub>, and y<sub>6</sub> receptors in the same buffer (except for salmon sperm DNA, the concentration of which was lowered to 60 μg/ml) supplemented with 10 mM dithiothreitol, 10% dextran sulfate, and 1.5 × 10<sup>7</sup> cpm/ml heat-denatured RNA riboprobes. Slices were then washed in 2× SSC at 50 C and treated with ribonuclease A (50 μg/ml) for 60 min at 37 C. Five final high stringency washes were performed in 0.01× SSC containing 14 mM β-mercaptoethanol and 0.05% sodium pyrophosphate. The tissue sections were dehydrated in ethanol, dipped into Kodak NTB2 liquid emulsion at 40 C, exposed for 2 months, and developed. To identify anatomical structures, the sections were stained with hematoxylin and observed with a Nikon Eclipse 600 microscope (Les Ulis, France) equipped for epifluorescence with an oil immersion objective (×60).

### Cell culture

NILs were collected in Ca<sup>2+</sup>-free Ringer's solution (15 mM HEPES buffer, 112 mM NaCl, 2 mM KCl, and 1 mM EGTA) supplemented with 2 mg glucose/ml, 0.3 mg BSA/ml, and 1% each of the kanamycin and antibiotic-antimycotic solutions. The Ringer's solution was gassed for 15 min with O<sub>2</sub>/CO<sub>2</sub> (95:5; vol/vol) before use, and the pH was adjusted to 7.35. Ten NILs were enzymatically dispersed at 24 C for 20 min with a solution of collagenase (1.5 mg/ml) in Ca<sup>2+</sup>-free Ringer's solution as previously described (48). Nondissociated neural lobes were removed by sedimentation, and the supernatant containing disaggregated intermediate lobes was collected. The suspension was centrifuged (30 × g, 5 min) and rinsed three times with Ca<sup>2+</sup>-free Ringer's medium. The digested tissues were resuspended in L15 medium adjusted to *R. ridibunda* osmolality (L15-water = 1:0.4) and supplemented with 0.2 mg glucose/ml, 0.063 mg CaCl<sub>2</sub>/ml, and 1% of the kanamycin and antibiotic-antimycotic solutions (f-L15; pH 7.35). The cells were dispersed by gentle aspiration through a siliconized Pasteur pipette with a flame-polished tip. Finally, cells were plated on poly-L-lysine-coated glass coverslips (30 mm diameter) at a density of 15,000 cells/coverslip in 35-mm culture dishes. When the cells had settled, coverslips were covered with 2 ml culture medium composed of f-L15 supplemented with

10% FBS. Cultured cells were kept at 24 C in a humidified atmosphere, and the culture medium was renewed every 48 h. Microfluorometric measurements were performed on 3- to 5-d-old cultured cells.

### Calcium measurement

Cultured cells were incubated at 24 C for 30 min in the dark with 5  $\mu$ M of the fluorescent calcium probe indo-1/AM in Ringer's solution (15 mM HEPES buffer, 112 mM NaCl, 2 mM KCl, and 2 mM  $CaCl_2$ ) supplemented with 2 mg glucose/ml and 0.3 mg BSA/ml. At the end of the incubation period, the cells were washed twice with 2 ml fresh medium and placed on the stage of a Nikon Diaphot inverted microscope equipped for epifluorescence with an oil immersion objective ( $\times 100$  CF Fluor series; numerical aperture, 1.3).  $[Ca^{2+}]_i$  was monitored by a dual emission microfluorometer system, as previously described (49). Briefly, the fluorescence emission of indo-1/AM induced by excitation at 355 nm (xenon lamp) was recorded at two wavelengths (405 nm, corresponding to the  $Ca^{2+}$ -complexed form, and 480 nm, corresponding to the free form), by separate photometers (P1, Nikon). The 405/480 ratio (R) was determined using an AS1-type acquisition card (Notocord Systems, Croissy-sur-Seine, France). All three signals (405 nm, 480 nm, and the 405/480 nm ratio) were continuously recorded with the JAD-FLUO program (version 1.2).  $[Ca^{2+}]_i$  was calculated according to the formula established by Grynkiewicz *et al.* (50):  $[Ca^{2+}]_i = K_d \times \beta(R - R_{min}) / (R_{max} - R)$ , where  $R_{min}$  is the minimum fluorescence ratio obtained after incubation of cells in Ringer's solution containing 10 mM EGTA and 10  $\mu$ M ionomycin,  $R_{max}$  is the maximum fluorescence ratio obtained after incubation of cells in Ringer's solution containing 10 mM  $CaCl_2$  and 10  $\mu$ M ionomycin, and  $\beta$  is the ratio of fluorescence yields from the  $Ca^{2+}$ -min/ $Ca^{2+}$ -max indicator at 480 nm. The values for  $R_{min}$ ,  $R_{max}$ , and  $\beta$  were 0.164, 1.82, and 1.62, respectively. The dissociation constant for indo-1 ( $K_d$ ) was previously determined (250 nM) (51, 52). A pressure ejection system was used to deliver the test substances in the vicinity of cultured cells.

Results are expressed as the mean amplitude of  $[Ca^{2+}]_i$  increase ( $\pm$ SEM). A *t* test was used for statistical analysis.

### Perfusion experiments

The perfusion technique used to determine the effects of test substances on  $\alpha$ -MSH release has been previously described in detail (53). For each experiment, four NILs were mixed with preswollen Bio-Gel P-2 beads and transferred into a plastic column (0.9 cm inner diameter). The tissues were perfused with Ringer's solution at constant flow rate (0.3 ml/min) and temperature (24 C). The effluent medium was collected as 2.5-min fractions during the infusion of the secretagogues and 7.5-min fractions during stabilization periods. The collected samples were immediately chilled at 4 C, and the concentration of  $\alpha$ -MSH was measured in each fraction on the same day as the perfusion experiment using a double-antibody RIA procedure (54). The perfusion profiles were calculated and expressed as a percentage of the basal secretory level. All experiments were carried out at least three times. The basal level of  $\alpha$ -MSH was calculated as the mean of five consecutive fractions (37.5 min) collected just before the infusion of each secretagogue. To compare the net increase in  $\alpha$ -MSH secretion induced by TRH in control conditions and under various treatments, the areas under the curve were calculated using the trapezoidal rule (55). A two-tailed paired *t* test was used to compare the mean secretory responses within the same set of experiments.

### cAMP measurement

Whole NILs were preincubated for 12 h at 24 C in *f*-L15 in the absence or presence of PTX (1  $\mu$ g/ml). NILs were then treated for 30 min with 0.1 mM isobutylmethylxanthine and incubated for 30 min in 0.5 ml Ringer's solution containing  $10^{-6}$  M fNPY and 0.1 mM isobutylmethylxanthine. The reaction was stopped by adding 0.5 ml ice-cold 20% trichloroacetic acid. NILs were homogenized with a glass Potter and centrifuged (10,000  $\times g$ ; 10 min). Trichloroacetic acid was eliminated from the supernatant by three successive rinses with 1 ml water-saturated diethyl ether. After evaporation of the ether phase, the supernatant was dried, and the cAMP content in the extract was measured by RIA

following the procedure recommended in the cAMP RIA kit (Amersham Pharmacia Biotech).

## Results

### Determination and distribution of NPY receptor subtypes in the frog NIL

RT-PCR analysis was carried out to determine which NPY receptor mRNAs are expressed in the frog NIL. Oligonucleotides were designed to amplify fragments of 93, 581, 422, and 434 bp corresponding, respectively, to the *R. ridibunda*  $Y_1$ ,  $Y_2$ ,  $Y_5$ , and  $y_6$  receptor subtypes recently cloned by us (unpublished).  $Y_1$  and  $Y_5$  receptor mRNA fragments of the expected lengths were amplified by RT-PCR (Fig. 1), whereas no  $Y_2$  or  $y_6$  receptor mRNA signal could be detected (data not shown). The identities of the fragments were confirmed by Southern blot analysis using an internal probe specific for each receptor subtype (Fig. 1). When reverse transcriptase was omitted, no amplification product was observed (Fig. 1).

The distribution of NPY receptor mRNAs in the frog NIL was investigated by *in situ* hybridization histochemistry. Microscopic examination of emulsion-coated slices revealed a high density of  $Y_1$  (Fig. 2A) and  $Y_5$  (Fig. 2C) mRNAs in the intermediate lobe, whereas only background signal was observed in the neural lobe. Control sections incubated with the sense  $Y_1$  and  $Y_5$  probes exhibited only weak background staining (Fig. 2, B and D).

### Effect of NPY analogs on $\alpha$ -MSH release from intact frog NILs

Administration of graded concentrations of  $[D-Trp^{32}]NPY$  induced a dose-related inhibition of  $\alpha$ -MSH release (Fig. 3A). The maximum inhibition (40%) was achieved at a dose of  $10^{-6}$  M  $[D-Trp^{32}]pNPY$ . As previously reported (44), fNPY provoked a concentration-dependent inhibition of basal  $\alpha$ -MSH release with an  $ED_{50}$  of  $10^{-7}$  M (Fig. 3B). Synthetic pPYY was slightly more potent than fNPY in inhibiting  $\alpha$ -MSH release with an  $ED_{50}$  of  $4.8 \times 10^{-8}$  M. pNPY-(2–36) was equipotent ( $ED_{50}$ ,  $10^{-7}$  M), but slightly more efficacious

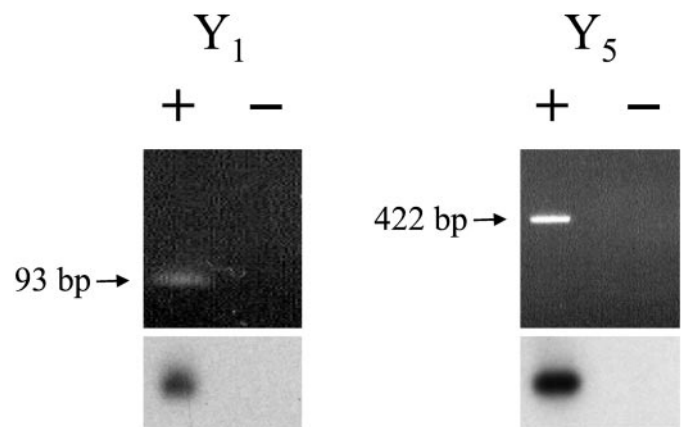

FIG. 1. RT-PCR analysis of NPY receptor mRNAs in the frog NIL. Total RNA was incubated in the presence (+) or absence (–) of reverse transcriptase, and the cDNAs obtained were amplified by PCR using specific  $Y_1$  and  $Y_5$  primers to generate products of 93 and 422 bp, respectively. The identities of the two bands were confirmed by Southern blot analysis with  $^{32}P$ -labeled frog  $Y_1$  or  $Y_5$  receptor riboprobes, as shown under the ethidium bromide-stained gels.



$Y_1$  mRNA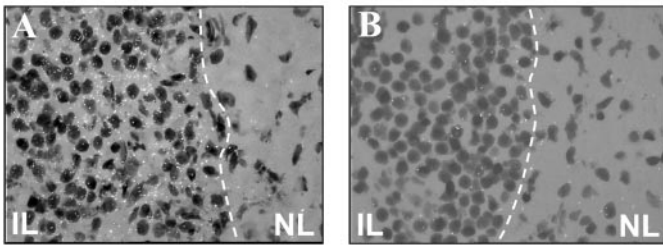 $Y_5$  mRNA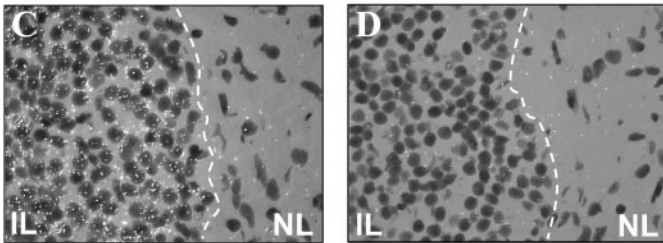

FIG. 2. Photomicrographs illustrating the cellular distribution of NPY receptor mRNAs in the frog NIL. A and B, Hybridization of pituitary sections with the antisense (A) or sense (B)  $Y_1$  riboprobe. C and D, Hybridization of pituitary sections with the antisense (C) or sense (D)  $Y_5$  riboprobe. Intense hybridization signal for  $Y_1$  and  $Y_5$  mRNAs is seen in the intermediate lobe (IL), whereas only background staining is observed in the neural lobe (NL). Hematoxylin counterstaining labeled only the nuclei.

than fNPY, yielding to an inhibition of  $83 \pm 4\%$  at a concentration of  $10^{-6}$  M. pNPY-(13–36) was less potent and only induced a  $47 \pm 2\%$  inhibition of  $\alpha$ -MSH release at a concentration of  $10^{-6}$  M. At a concentration of  $10^{-6}$  M, [Leu<sup>31</sup>,Pro<sup>34</sup>]pNPY only induced a 40% inhibition of  $\alpha$ -MSH release (Fig. 3B).

#### Effects of NPY analogs on TRH-induced $\alpha$ -MSH secretion from intact frog NILs

Prolonged infusion of fNPY ( $3.16 \times 10^{-7}$  M; 120 min) provoked a marked and sustained decrease in  $\alpha$ -MSH release and totally suppressed TRH ( $10^{-8}$  M; 10 min)-induced  $\alpha$ -MSH secretion (Fig. 4, A and B). pPYY ( $10^{-6}$  M) and [Leu<sup>31</sup>,Pro<sup>34</sup>]pNPY ( $10^{-6}$  M) mimicked the inhibitory effect of fNPY on basal and TRH-evoked  $\alpha$ -MSH secretion (Fig. 4, C and D). Administration of the  $Y_2/Y_5$  agonist pNPY-(13–36) ( $10^{-6}$  M) or the selective  $Y_5$  agonist [D-Trp<sup>32</sup>]pNPY ( $10^{-6}$  M) inhibited the spontaneous release of  $\alpha$ -MSH, but had no significant effect on TRH-induced  $\alpha$ -MSH secretion (Fig. 4, E and F).

#### Effect of PTX pretreatment on NPY-evoked inhibition of the TRH response and cAMP formation

Preincubation of frog NILs with PTX ( $1 \mu\text{g/ml}$ ; 12 h) did not impair the inhibitory effect of fNPY ( $3.16 \times 10^{-7}$  M) on basal  $\alpha$ -MSH release, but restored the stimulatory effect of TRH ( $10^{-8}$  M; 10 min) on  $\alpha$ -MSH secretion during prolonged infusion of fNPY (Fig. 5). Pretreatment with PTX did not

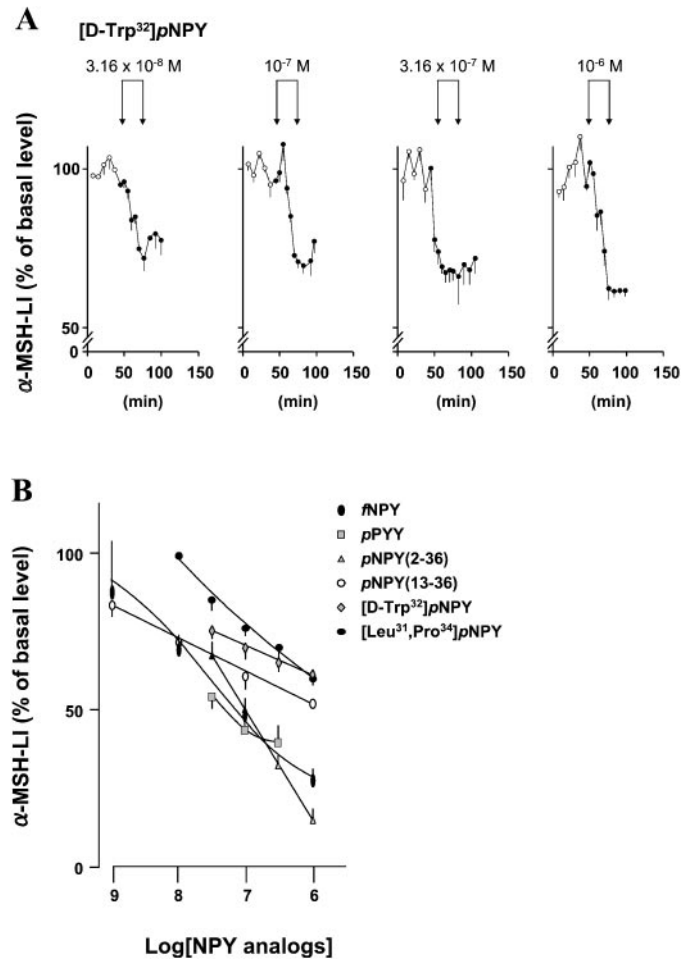

FIG. 3. Effects of NPY analogs on  $\alpha$ -MSH release from perfused frog NILs. Effect of graded concentrations of [D-Trp<sup>32</sup>]pNPY on  $\alpha$ -MSH release. After a 45-min equilibration period, [D-Trp<sup>32</sup>]pNPY was infused for 20 min (arrows). Each profile represents the mean  $\pm$  SEM secretion pattern of four independent perfusion experiments. The spontaneous level of  $\alpha$ -MSH release (100% basal level) was calculated as the mean  $\alpha$ -MSH concentration in the first five consecutive fractions ( $\circ$ ; 37.5 min). B, Semilogarithmic plot comparing the effects of the various NPY analogs on  $\alpha$ -MSH release. Experimental values were calculated from data similar to those shown in A. Each point represents the maximum amplitude of inhibition of  $\alpha$ -MSH release induced by NPY and its analogs. The mean basal level of  $\alpha$ -MSH release in these experiments was  $112 \pm 16$  pg/min-NIL.

affect the TRH-induced stimulation of  $\alpha$ -MSH secretion (data not shown).

Incubation of frog NILs with fNPY ( $10^{-6}$  M) produced a significant decrease in cAMP content in the tissue ( $P < 0.001$ ; data not shown). Pretreatment of NILs with PTX ( $1 \mu\text{g/ml}$ ; 12 h) had no effect on the fNPY-induced inhibition of cAMP formation (data not shown).

#### Effect of NPY on TRH-induced $[Ca^{2+}]_i$ increase

As previously reported (56), TRH ( $10^{-7}$  M; 5 sec) provoked two distinct types of calcium responses in cultured frog melanotrope cells. In two thirds of the cells TRH ( $10^{-7}$  M; 5 sec) caused a sustained increase in  $[Ca^{2+}]_i$ , and in one third of the cells TRH only induced a transient increase in  $[Ca^{2+}]_i$  (Fig. 6A). Preincubation of the cells with fNPY ( $10^{-7}$  M; 10 min)

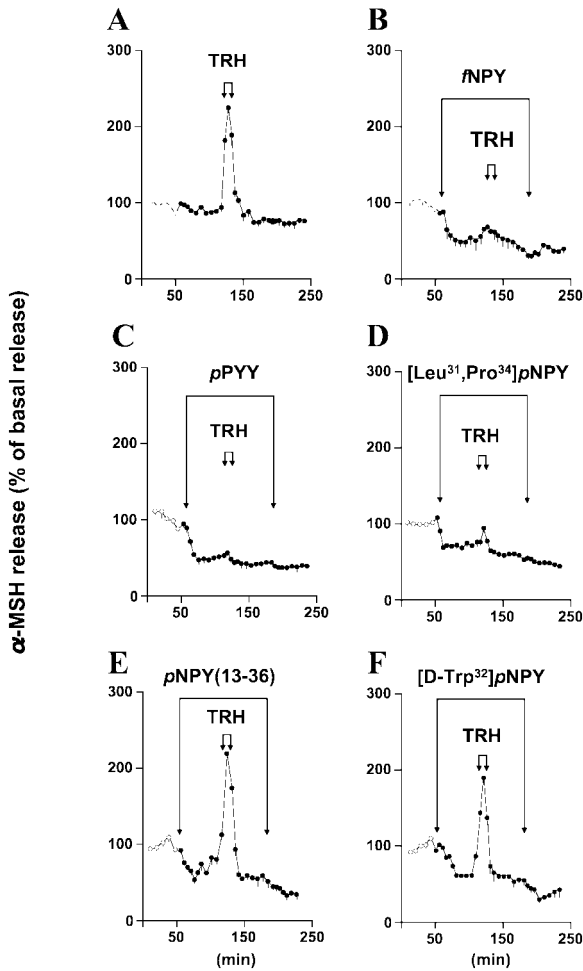

FIG. 4. Effects of NPY analogs on TRH-induced  $\alpha$ -MSH secretion from perfused frog NILs. A, Effect of a single pulse of TRH ( $10^{-8}$  M; 10 min) on  $\alpha$ -MSH secretion (control). B–F, Effect of TRH ( $10^{-8}$  M; 10 min) during prolonged (120-min) infusion of fNPY ( $3.16 \times 10^{-7}$  M; B), pPYY ( $10^{-6}$  M; C), [Leu<sup>31</sup>,Pro<sup>34</sup>]pNPY ( $10^{-6}$  M; D), pNPY(13–36) ( $10^{-6}$  M; E), [D-Trp<sup>32</sup>]pNPY ( $10^{-6}$  M; F). Each profile represents the mean  $\pm$  SEM secretion pattern of four independent perfusion experiments. The spontaneous level of  $\alpha$ -MSH release (100% basal level) was calculated as the mean  $\alpha$ -MSH concentration in the first five consecutive fractions ( $\circ$ ; 37.5 min). The mean basal level of  $\alpha$ -MSH release in these experiments was  $102 \pm 15$  pg/min·NIL.

totally suppressed the plateau phase of the  $[Ca^{2+}]_i$  response to TRH (Fig. 6B). Exposure of the cells to  $\omega$ -CgTx ( $10^{-7}$  M; 10 min) also suppressed the sustained phase of TRH-induced  $[Ca^{2+}]_i$  increase (Fig. 6C). In addition, both fNPY and  $\omega$ -CgTx significantly ( $P < 0.001$ ) reduced the amplitude of the transient  $[Ca^{2+}]_i$  response to TRH (Fig. 6D). In contrast to fNPY, which suppressed the stimulatory effect of TRH on  $\alpha$ -MSH release (Fig. 4B),  $\omega$ -CgTx ( $10^{-6}$  M) had no effect (Fig. 7).

### Discussion

It has been previously shown that TRH stimulates, while NPY inhibits,  $\alpha$ -MSH secretion from amphibian melanotrope cells (6, 8, 10, 13, 14). The present report now demonstrates that the inhibitory effects of NPY on spontaneous and TRH-evoked  $\alpha$ -MSH secretion are mediated through two distinct receptors.

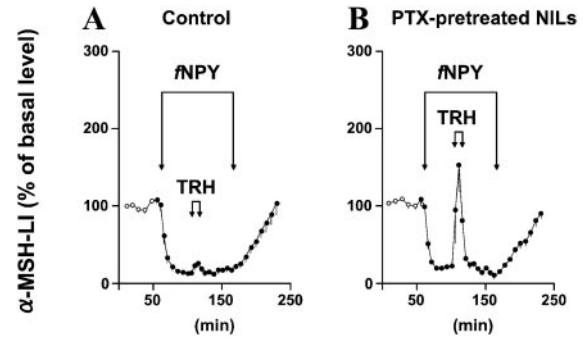

FIG. 5. Effect of PTX pretreatment on the response of perfused frog NILs to TRH ( $10^{-8}$  M; 10 min) during prolonged infusion of fNPY ( $3.16 \times 10^{-7}$  M; 120 min). Frog NILs were preincubated at 24 C for 12 h in the absence (A) or presence (B) of PTX (1  $\mu$ g/ml) before the perfusion experiment. The mean basal level of  $\alpha$ -MSH release in these experiments was  $85 \pm 14$  pg/min·NIL. See Fig. 4 for other details.

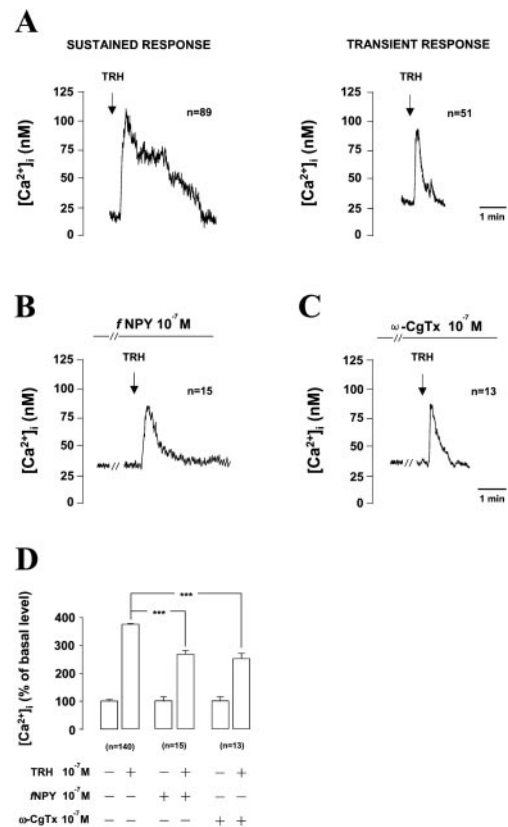

FIG. 6. Effects of TRH, fNPY, and  $\omega$ -CgTx on intracellular calcium concentrations ( $[Ca^{2+}]_i$ ) in cultured frog melanotrope cells. A, Typical profiles illustrating the two types of  $Ca^{2+}$  responses that were observed after administration of a single pulse of TRH ( $10^{-7}$  M; 5 sec) to melanotrope cells. B, Typical profile illustrating the effect of fNPY ( $10^{-7}$  M; 10 min) on the TRH-induced  $[Ca^{2+}]_i$  increase. C, Typical profile illustrating the effect  $\omega$ -CgTx ( $10^{-7}$  M; 10 min) on the TRH-induced  $[Ca^{2+}]_i$  increase. Arrows indicate the onset of TRH administration. D, Histograms showing the mean effects of fNPY and  $\omega$ -CgTx on the amplitude of the  $[Ca^{2+}]_i$  transient induced by TRH. \*\*\*,  $P < 0.001$ .

### Expression of NPY receptors in frog melanotrope cells

The effects of NPY are mediated through at least five types of seven-membrane-spanning domain G protein-coupled re-

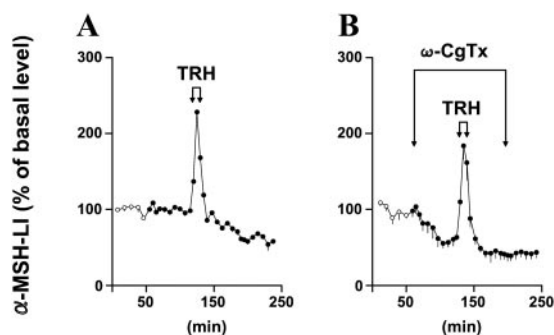

FIG. 7. Effect of  $\omega$ -CgTx on TRH-induced  $\alpha$ -MSH secretion from perfused frog NILs. A single pulse of TRH ( $10^{-8}$  M; 10 min) was administered in control conditions (A) or 45 min after the onset of  $\omega$ -CgTx ( $10^{-6}$  M; B). The mean basal level of  $\alpha$ -MSH in these experiments was  $121 \pm 12$  pg/min·NIL. See Fig. 4 for other details.

ceptors, termed  $Y_1$ ,  $Y_2$ ,  $Y_4$ ,  $Y_5$ , and  $y_6$  (for review, see Refs. 19–21). Using an RT-PCR strategy, we recently determined partial sequences of the  $Y_1$ ,  $Y_2$ ,  $Y_5$ , and  $y_6$  subtypes in the frog *R. ridibunda* (unpublished data). In the present study we took advantage of the availability of these nucleotide sequences to investigate which receptor isoforms are expressed in frog melanotrope cells.

RT-PCR amplification revealed that both  $Y_1$  and  $Y_5$  receptor mRNAs, but not  $Y_2$  and  $y_6$  transcripts, are present in the frog NIL. Southern blot analysis confirmed that the PCR products corresponded to  $Y_1$  and  $Y_5$  cDNAs. As the RT-PCR reaction was conducted on RNA from whole NILs, *in situ* hybridization experiments were performed to determine the precise location of each receptor transcript. Both the  $Y_1$  and  $Y_5$  riboprobes produced intense hybridization signal over the intermediate lobe, whereas the neural lobe was totally negative. In the same conditions no hybridization signal was detected with the  $Y_2$  and  $y_6$  probes. These observations clearly indicate that the  $Y_1$  and  $Y_5$ , but not the  $Y_2$  and  $y_6$ , receptor isoforms are expressed in frog melanotrope cells.

A  $Y_1$  receptor has been previously cloned in the toad *X. laevis* using a hypothalamus cDNA library (57), but to our knowledge the occurrence of  $Y_1$  mRNA has not been described in the pars intermedia of the pituitary. In mammals, the presence of  $Y_1$  mRNA has been detected in the anterior lobe, but not in the posterior lobe, of the pituitary (58). Thus, the present report provides the first molecular characterization of NPY receptor isoforms in the pars intermedia of the pituitary.

#### Two distinct receptors mediate the inhibitory effect of NPY on basal and TRH-evoked $\alpha$ -MSH secretion

In amphibians, NPY is a highly potent  $\alpha$ -MSH release-inhibiting factor (8, 10, 45). We have previously shown that in the frog *R. ridibunda*, NPY inhibits both basal and TRH-evoked  $\alpha$ -MSH secretion (8, 45, 59). The present study revealed that PTX pretreatment did not impair the inhibitory action of NPY on spontaneous  $\alpha$ -MSH release, but virtually abolished the inhibitory effect of NPY on TRH-induced  $\alpha$ -MSH secretion, indicating that two distinct receptors are involved in the inhibitory effects of NPY on frog melanotrope cells.

Various NPY analogs were used to determine the receptor

subtype that mediates the inhibitory effect of NPY on basal  $\alpha$ -MSH release. The observation that the  $Y_2/Y_5$  agonist NPY-(13–36) (19, 20) depressed  $\alpha$ -MSH release from perfused frog NILs indicated that  $Y_1$  receptors are not involved in the inhibitory effect of NPY. Concurrently, the fact that the selective  $Y_1/Y_4/Y_5$  agonist [Leu<sup>31</sup>,Pro<sup>34</sup>]NPY (19, 20) mimicked the inhibitory effect of NPY revealed that the action of the peptide on spontaneous  $\alpha$ -MSH release is not mediated through  $Y_2$  receptors. Consistent with this latter finding, *in situ* hybridization experiments have shown that  $Y_2$  receptor mRNA are not expressed in the frog pars intermedia. The possible involvement of  $Y_3$  receptors was excluded, inasmuch as PYY, which activates all NPY receptor subtypes, except for the  $Y_3$  isoform (19, 20), decreased spontaneous  $\alpha$ -MSH release. The observation that C-terminal fragments of NPY, which do not bind  $Y_4$  receptors (19, 20), inhibited the basal secretory activity indicated that a  $Y_4$  receptor is not implicated in the action of NPY on spontaneous  $\alpha$ -MSH release. In contrast, the fact that the specific  $Y_5$  agonist [D-Trp<sup>32</sup>]NPY (22) inhibited  $\alpha$ -MSH release suggested that the effect of NPY on basal secretory activity of melanotrope cells is preferentially mediated through the  $Y_5$  receptor subtype. In support of this hypothesis, RT-PCR analysis and *in situ* hybridization labeling revealed that the  $Y_5$  receptor gene is actively expressed in the frog intermediate lobe.

The same type of pharmacological approach was used to characterize the NPY receptor isoform responsible for inhibition of TRH-induced  $\alpha$ -MSH secretion. The data showed that PYY and [Leu<sup>31</sup>,Pro<sup>34</sup>]NPY mimicked the inhibitory action of NPY. In contrast, NPY-(13–36) and [D-Trp<sup>32</sup>]NPY, although reducing the basal secretory activity, did not affect TRH-induced  $\alpha$ -MSH secretion. Taken together, these observations suggest that NPY probably suppresses the stimulatory effect of TRH on  $\alpha$ -MSH release through activation of a  $Y_1$  receptor subtype.

#### Transduction mechanisms implicated in the inhibitory effect of NPY on basal and TRH-evoked $\alpha$ -MSH secretion

In mammalian cells the different NPY receptor subtypes are negatively coupled to adenylyl cyclase through a PTX-sensitive G protein-coupled receptor (for review, see Refs. 19 and 20). In frog melanotrope cells, PTX pretreatment did not impair the inhibitory effect of NPY on cAMP formation and basal  $\alpha$ -MSH release, but PTX suppressed the action of NPY on TRH-evoked  $\alpha$ -MSH secretion. These data indicate that the inhibitory effect of NPY on the spontaneous release of  $\alpha$ -MSH probably involves a PTX-insensitive  $G_z$  protein (60, 61) and that NPY-induced inhibition of the secretory response of melanotrope cells to TRH is not mediated through the adenylyl cyclase system. Consistent with this concept, we have previously shown that the adenylyl cyclase/PKA pathway is not involved in TRH-induced  $\alpha$ -MSH secretion (62). In GH<sub>3</sub> cells, activation of MAPK by tyrosine phosphorylation plays a crucial role in TRH-induced PRL release (29, 32). In addition, in rat lactotrophs, dopamine inhibits the stimulatory effect of TRH on PRL release and MAPK activity through a PTX-sensitive G protein-coupled receptor (28, 63). The fact that in frog melanotrope cells tyrosine kinase inhibitors abrogate TRH-induced  $\alpha$ -MSH secretion indirectly



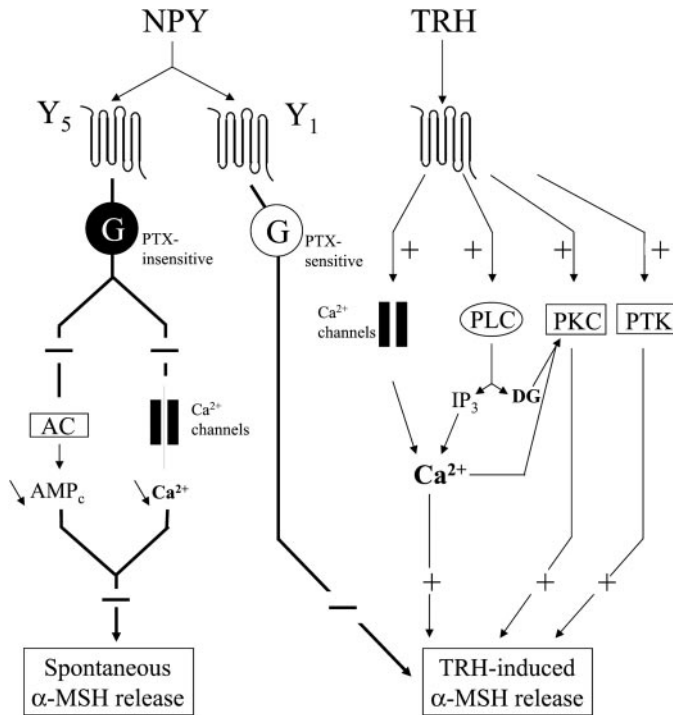

FIG. 8. Schematic representation summarizing the intracellular events associated with the effect of NPY on basal and TRH-induced  $\alpha$ -MSH secretion in frog melanotrope cells. It has been previously shown that TRH stimulates  $\alpha$ -MSH release by increasing  $[Ca^{2+}]_i$  and by activating PKC and protein tyrosine kinase (PTK) (62). NPY acting through a Y<sub>5</sub> receptor subtype coupled to a PTX-insensitive G protein causes inhibition of adenylyl cyclase and calcium channels, leading to a decrease in spontaneous  $\alpha$ -MSH release. Concurrently, NPY acting through a Y<sub>1</sub> receptor coupled to a PTX-sensitive G protein suppresses TRH-induced  $\alpha$ -MSH secretion.

suggests that the inhibitory effect of NPY on the secretory response to TRH is mediated through a tyrosine kinase-dependent pathway.

We have previously shown that in cultured melanotrope cells TRH induces two types of  $[Ca^{2+}]_i$  responses: in about two thirds of the cells, TRH causes a sustained and biphasic increase in  $[Ca^{2+}]_i$ , whereas in one third of the cells, TRH induces only a transient response (56). The differential profile of the  $Ca^{2+}$  responses may be ascribed to the existence of two subtypes of melanotrope cells (64, 65). Exposure of melanotrope cells to NPY abolished the sustained phase of the  $Ca^{2+}$  response evoked by TRH, and this effect was mimicked by  $\omega$ -CgTx, suggesting that the inhibitory effect of NPY on TRH-evoked  $[Ca^{2+}]_i$  is mediated through modulation of N-type  $Ca^{2+}$  channels. In support of this hypothesis, it has already been shown that in frog and toad melanotrope cells, NPY inhibits N-type calcium channels (66, 67). It should be noted, however, that  $\omega$ -CgTx, in contrast to NPY, did not affect TRH-induced  $\alpha$ -MSH secretion. These data indicate that NPY makes melanotrope cells insensitive to an increase in  $[Ca^{2+}]_i$  that otherwise is sufficient to trigger  $\alpha$ -MSH release. Similarly, a single administration of dopamine or repeated pulses of TRH make rat anterior pituitary cells insensitive to the increase in  $[Ca^{2+}]_i$  (68, 69). In frog melanotrope cells, the dissociation between changes in  $[Ca^{2+}]_i$  and  $\alpha$ -MSH secre-

tion suggests that NPY blocks a final and crucial step of the exocytotic process.

A proposed model illustrating the dual effects of NPY on spontaneous  $\alpha$ -MSH release and TRH-induced  $\alpha$ -MSH secretion is shown in Fig. 8. Melanotrope cells express both the Y<sub>1</sub> and Y<sub>5</sub> receptor subtypes. Activation of Y<sub>5</sub> receptors, which operate through a PTX-insensitive G protein-coupled receptor, provokes a decrease in adenylyl cyclase activity and a reduction of calcium influx through N-type  $Ca^{2+}$  channels, leading to inhibition of  $\alpha$ -MSH release. Activation of Y<sub>1</sub> receptors, which operate through a PTX-sensitive G protein-coupled receptor, reduces the effect of TRH on  $[Ca^{2+}]_i$  and suppresses TRH-evoked  $\alpha$ -MSH secretion. Although NPY and  $\omega$ -CgTx GVIA had identical effects on the TRH-induced increase in  $[Ca^{2+}]_i$ ,  $\omega$ -CgTx did not impair the secretory response to TRH, indicating that the inhibitory effect of NPY on TRH-evoked  $\alpha$ -MSH secretion cannot be ascribed to a reduction of the  $[Ca^{2+}]_i$  transient. Whether the inhibitory effect of NPY on TRH-induced  $\alpha$ -MSH secretion can be accounted for by blockage of protein tyrosine kinase activation deserves further investigation.

### Acknowledgments

The authors thank Mrs. D. Cartier and Mr. P. Bizet for technical assistance with the RT-PCR experiments and *in situ* hybridization histochemistry.

Received September 4, 2001. Accepted January 7, 2002.

Address all correspondence and requests for reprints to: Dr. Hubert Vaudry, European Institute for Peptide Research (IFRMP 23), Laboratory of Cellular and Molecular Neuroendocrinology, INSERM, U-413, UA Centre National de la Recherche Scientifique, University of Rouen, 76821 Mont-Saint-Aignan, France. E-mail: hubert.vaudry@univ-rouen.fr.

This work was supported by grants from INSERM (U-413), an INSERM-FRSQ exchange program, the LARC-Neuroscience network, and the Conseil Régional de Haute-Normandie.

\* Recipient of a fellowship from the Ministère de la Recherche.

† Affiliated professor at the Institut National de la Recherche et de la Santé-Institut Armand Frappier (Montréal, Canada).

### References

1. Tonon MC, Desrues L, Lamacz M, Chartrel N, Jenks B, Vaudry H 1993 Multihormonal regulation of pituitary melanotrophs. *Ann NY Acad Sci* 680: 175–187
2. Jenks BG, Leenders HJ, Martens GJM, Roubos EW 1993 Adaptation physiology: the functioning of pituitary melanotrope cells during background adaptation of the amphibian *Xenopus laevis*. *Zool Sci* 10:1–11
3. Vaudry H, Lamacz M, Desrues L, Louiset E, Valentijn J, Mei YA, Chartrel N, Conlon JM, Cazin L, Tonon MC 1994 The melanotrope cell of the frog pituitary as a model of neuroendocrine integration. In: Davey KG, Peter RE, Tobe SS, eds. *Perspectives in comparative endocrinology*. Ottawa, Canada: National Research Council of Canada; 5–11
4. Roubos EW 1997 Background adaptation by *Xenopus laevis*: a model for studying neuronal information processing in the pituitary pars intermedia. *Comp Biochem Physiol* 118:533–550
5. Seki T, Nakai Y, Shioda S, Mitsuma T, Kikuyama S 1983 Distribution of immunoreactive thyrotropin-releasing hormone in the forebrain and hypophysis of the bullfrog, *Rana catesbeiana*. *Cell Tissue Res* 233:507–516
6. Verburg-van Kemenade BML, Jenks BG, Visser TJ, Tonon MC, Vaudry H 1987 Assessment of TRH as a potential MSH release stimulating factor in *Xenopus laevis*. *Peptides* 8:69–76
7. Lamacz M, Hindelang C, Tonon MC, Vaudry H, Stoeckel ME 1989 Three distinct TRH-immunoreactive axonal systems project in the median eminence-pituitary complex of the frog *Rana ridibunda*. Immunocytochemical evidence for co-localization of TRH and mesotocin in fibers innervating pars intermedia cells. *Neuroscience* 32:451–462
8. Danger JM, Leboulenger F, Guy J, Tonon MC, Benyamina M, Martel JC, Saint-Pierre S, Pelletier G, Vaudry H 1986 Neuropeptide Y in the intermediate

- lobe of the frog pituitary acts as an  $\alpha$ -MSH-release inhibiting factor. *Life Sci* 39:1183–1192
9. Cailliez D, Danger JM, Andersen AC, Polak JM, Pelletier G, Kawamura K, Kikuyama S, Vaudry H 1987 Neuropeptide Y (NPY)-like immunoreactive neurons in the brain and pituitary of the amphibian *Rana catesbeiana*. *Zool Sci* 4:123–134
  10. Verbarg-van Kemenade BML, Jenks BG, Danger JM, Vaudry H, Pelletier G, Saint-Pierre S 1987 A NPY-like peptide may function as MSH-release inhibiting factor in *Xenopus laevis*. *Peptides* 8:61–67
  11. de Rijk EPCT, van Strien FJC, Roubos EW 1992 Demonstration of coexisting catecholamine (dopamine), amino acid (GABA), and peptide (NPY) involved in inhibition of melanotrope cell activity in *Xenopus laevis*: a quantitative ultrastructural, freeze-substitution immunocytochemical study. *J Neurosci* 12: 864–871
  12. Tonon MC, Bosler O, Stoeckel ME, Pelletier G, Tappaz M, Vaudry H 1992 Colocalization of tyrosine hydroxylase, GABA and neuropeptide Y within axon terminals innervating the intermediate lobe of the frog *Rana ridibunda*. *J Comp Neurol* 319:599–605
  13. Tonon MC, Leroux P, Le Boulenger F, Delarue C, Jégou S, Fresel J, Vaudry H 1980 Thyrotropin-releasing hormone stimulates the release of melanotropin from frog neurointermediate lobe *in vitro*. *Life Sci* 26:869–875
  14. Tonon MC, Leroux P, Stoeckel ME, Jégou S, Pelletier G, Vaudry H 1983 Catecholaminergic control of  $\alpha$ -melanocyte-stimulating hormone ( $\alpha$ -MSH) release by frog neurointermediate lobe *in vitro*: evidence for direct stimulation of  $\alpha$ -MSH release by thyrotropin-releasing hormone. *Endocrinology* 112: 133–141
  15. Gershengorn MC, Osman R 1996 Molecular and cellular biology of thyrotropin-releasing hormone receptors. *Physiol Rev* 76:175–191
  16. Yamada M, Hashimoto K, Satoh T, Shibusawa N, Kohga H, Ozawa Y, Yamada S, Mori M 1997 A novel transcript for the thyrotropin-releasing hormone receptor in human pituitary and pituitary tumors. *J Clin Endocrinol Metab* 82:4224–4228
  17. Cao J, O'Donnell D, Vu H, Payza K, Pou C, Godbout C, Jakob A, Pelletier M, Lembo P, Ahmad S, Walker P 1998 Cloning and characterization of a cDNA encoding a novel subtype of rat thyrotropin-releasing hormone receptor. *J Biol Chem* 273:32281–32287
  18. Itadani H, Nakamura T, Itoh J, Iwaasa H, Kanatani A, Borkowski J, Ihara M, Ohta M 1998 Cloning and characterization of a new subtype of thyrotropin-releasing hormone receptors. *Biochem Biophys Res Commun* 250:68–71
  19. Blomqvist AG, Herzog H 1997 Y-Receptor subtypes—how many more? *Trends Neurosci* 20:294–298
  20. Michel MC, Beck-Sickinger A, Cox H, Doods HN, Herzog H, Larhammar D, Quirion R, Schwartz T, Westfall T 1998 International union of pharmacological recommendations for the nomenclature of neuropeptide Y, peptide YY, and pancreatic polypeptide receptors. *Pharmacol Rev* 50:143–150
  21. Larhammar D, Wraith A, Berglund MM, Holmberg SK, Lundell I 2001 Origins of the many NPY-family receptors in mammals. *Peptides* 22:295–307
  22. Raposo PD, Broqua P, Pierroz DD, Hayward A, Dumont Y, Quirion R, Junien JL, Aubert ML 1999 Evidence that the inhibition of luteinizing hormone secretion exerted by central administration of neuropeptide Y (NPY) in the rat is predominantly mediated by the NPY-Y<sub>5</sub> receptor subtype. *Endocrinology* 140:4046–4055
  23. Gershengorn MC 1989 Role of inositol lipid second messengers in regulation of secretion: studies of thyrotropin-releasing hormone action in pituitary cells. *Soc Gen Physiol Ser* 44:1–15
  24. Hinkle PM, Nelson EJ, Asworth R 1996 Characterization of the calcium response to thyrotropin-releasing hormone in lactotrophs and GH cells. *Trends Endocrinol Metab* 7:370–374
  25. Gautvik KM, Gordeladze JO, Jahnsen T, Haug E, Hansson V, Lystad E 1983 Thyroliberin receptor binding and adenyl cyclase activation in cultured prolactin-producing rat pituitary tumor cells (GH cells). *J Biol Chem* 258: 10304–10311
  26. Paulssen RH, Paulssen EJ, Gautvik KM, Gordeladze JO 1992 The thyroliberin receptor interacts directly with a stimulatory guanine-nucleotide-binding protein in the activation of adenyl cyclase in GH<sub>3</sub> rat pituitary tumor cells. Evidence obtained by the use of antisense RNA inhibition and immunoblocking of the stimulatory guanine-nucleotide-binding protein. *Eur J Biochem* 204:413–418
  27. Kolesnick RN, Musacchio I, Thaw C, Gershengorn MC 1984 Arachidonic acid mobilizes calcium and stimulates prolactin secretion from GH<sub>3</sub> cells. *Am J Physiol* 246:458–462
  28. Ohmichi M, Hirota K, Koike K, Kadowaki K, Yamaguchi M, Miyake A, Tanizawa O 1990 Dopamine inhibits the arachidonate and prolactin release stimulated by thyrotropin-releasing hormone through an islet-activating protein-sensitive GTP-binding protein in anterior pituitary cells. *Neuroendocrinology* 52:75–81
  29. Kanda Y, Koike K, Ohmichi M, Sawada T, Hirota K, Miyake A 1994 A possible involvement of tyrosine kinase in TRH-induced prolactin secretion in GH<sub>3</sub> cells. *Biochem Biophys Res Commun* 3:1447–1452
  30. Jefferson AB, Travis SM, Schulman H 1991 Activation of multifunctional Ca<sup>2+</sup>/calmodulin-dependent protein kinase in GH<sub>3</sub> cells. *J Biol Chem* 266: 1484–1490
  31. Cui ZJ, Gorelick FS, Dannies PS 1994 Calcium/calmodulin-dependent protein kinase-II activation in rat pituitary cells in the presence of thyrotropin-releasing hormone and dopamine. *Endocrinology* 134:2245–2250
  32. Ohmichi M, Sawada T, Kanda Y, Koike K, Hirota K, Miyake A, Saltiel AR 1994 Thyrotropin-releasing hormone stimulates MAP kinase activity in GH<sub>3</sub> cells by divergent pathways. *J Biol Chem* 269:3783–3788
  33. Palomero T, Barros F, Camino D, Vilorio CG, Pena P 1998 A G protein  $\beta\gamma$  dimer-mediated pathway contributes to mitogen-activated protein kinase activation by thyrotropin-releasing hormone receptors in transfected COS-7 cells. *Mol Pharmacol* 53:613–622
  34. Michel MC, Feth F, Stieneker M, Rascher W 1992 NPY and carbachol raise Ca<sup>2+</sup> in SK-N-MC cells by three different mechanisms. *Arch Pharmacol* 345: 370–374
  35. Ohtomo Y, Ono S, Zettergren E, Sahlgren B 1996 Neuropeptide Y regulates rat renal tubular Na,K-ATPase through several signalling pathways. *Acta Physiol Scand* 158:97–105
  36. Simmoneaux V, Rodeau JL, Calgari C, Pévet P 1999 Neuropeptide Y increases intracellular calcium in rat pinealocytes. *Eur J Neurosci* 11:725–728
  37. Sun L, Miller RJ 1999 Multiple neuropeptide Y receptors regulate K<sup>+</sup> and Ca<sup>2+</sup> channels in acutely isolated neurons from the rat arcuate nucleus. *J Neurophysiol* 81:1391–1403
  38. Jacques D, Sader S, El-Bizri N, Chouffani S, Hassan G, Shbaklo H 2000 Neuropeptide Y induced increase of cytosolic and nuclear Ca<sup>2+</sup> in heart and vascular smooth muscle cells. *Can J Physiol Pharmacol* 78:162–172
  39. Martin SE, Patterson RE 1989 Coronary constriction due to neuropeptide Y: alleviation with cyclooxygenase blockers. *Am J Physiol* 257:H927–H934
  40. Goldberg Y, Taimor G, Piper HM, Schluter KD 1998 Intracellular signalling leads to the hypertrophic effect of neuropeptide Y. *Am J Physiol* 275:1207–1215
  41. Shigeri Y, Fujimoto M 1994 Y<sub>2</sub> receptors for neuropeptide Y are coupled to three intracellular signal transduction pathways in a human neuroblastoma cell line. *J Biol Chem* 269:8842–8848
  42. Xiong Z, Cheung DW 1995 ATP-dependent inhibition of Ca<sup>2+</sup>-activated K<sup>+</sup> channels in vascular smooth muscle cells by neuropeptide Y. *Pflugers Arch* 431:110–116
  43. Keffel S, Schmidt M, Bischoff A, Michel MC 1999 Neuropeptide-Y stimulation of extracellular signal-regulated kinases in human erythroleukemia cells. *J Pharmacol Exp Ther* 291:1172–1178
  44. Nakamura M, Sakanaka C, Aoki Y, Ogasawara H, Tsuji, Kodama H, Matsumoto T, Shimizu T, Noma M 1995 Identification of two isoforms of mouse neuropeptide Y-Y<sub>1</sub> receptor generated by alternative splicing. Isolation, genomic structure, and functional expression of the receptors. *J Biol Chem* 270:30102–30110
  45. Chartrel N, Conlon JM, Danger JM, Fournier A, Tonon MC, Vaudry H 1991 Characterization of melanotropin-release-inhibiting factor (melanostatin) from frog brain: homology with human neuropeptide Y. *Proc Natl Acad Sci USA* 88:3862–3866
  46. Chomczynski P, Sacchi N 1987 Single-step method of RNA isolation by acid guanidinium thiocyanate-phenol-chloroform extraction. *Anal Biochem* 162: 156–159
  47. Alexandre D, Anouar Y, Jégou S, Fournier A, Vaudry H 1999 A cloned frog vasoactive intestinal polypeptide/pituitary adenylate cyclase-activating polypeptide receptor exhibits pharmacological and tissue distribution characteristics of both VPAC1 and VPAC2 receptors in mammals. *Endocrinology* 140:1285–1293
  48. Louiset E, Mckernan R, Sieghart W, Vaudry H 2000 Subunit composition and pharmacological characterization of  $\gamma$ -aminobutyric acid type A receptors in frog pituitary melanotrophs. *Endocrinology* 141:1083–1092
  49. Larcher A, Lamacz M, Delarue C, Vaudry H 1992 Effect of vasotocin on cytosolic free calcium concentrations in frog adrenocortical cells in primary culture. *Endocrinology* 131:1087–1093
  50. Grynkiewicz G, Poenie M, Tsien RY 1985 A new generation of Ca<sup>2+</sup> indicators with greatly improved fluorescence properties. *J Biol Chem* 260:3440–3450
  51. Mollard P, Guérineau N, Audin J, Dufy B 1989 Measurement of Ca<sup>2+</sup> transients using simultaneous dual-emission microspectrofluorimetry and electrophysiology in individual pituitary cells. *Biochem Biophys Res Commun* 164:1045–1052
  52. Desrues L, Vaudry H, Lamacz M, Tonon MC 1995 Mechanism of action of  $\gamma$ -aminobutyric acid on frog melanotrophs. *J Mol Endocrinol* 14:1–12
  53. Garnier M, Lamacz M, Galas L, Lenglet S, Tonon MC, Vaudry H 1998 Pharmacological and functional characterization of muscarinic receptors in the frog pars intermedia. *Endocrinology* 139:3525–3533
  54. Vaudry H, Tonon MC, Delarue C, Vaillant R, Kraicer J 1978 Biological and radioimmunological evidence for melanocyte-stimulating hormones (MSH) of extrapituitary origin in the rat brain. *Neuroendocrinology* 27:9–24
  55. Contesse V, Hamel C, Lefebvre H, Dumuis A, Vaudry H, Delarue C 1996 Activation of 5-hydroxytryptamine<sub>4</sub> receptors causes calcium influx in adrenocortical cells: involvement of calcium in 5-hydroxytryptamine-induced steroid secretion. *Mol Pharmacol* 49:481–493
  56. Galas L, Lamacz M, Garnier M, Roubos EW, Tonon MC, Vaudry H 1998 Involvement of extracellular and intracellular calcium sources in TRH-induced  $\alpha$ -MSH secretion from frog melanotrope cells. *Mol Cell Endocrinol* 138:25–39



57. Blomqvist AG, Roubos EW, Larhammar D, Martens GJ 1995 Cloning and sequence analysis of a neuropeptide Y/peptide YY receptor  $Y_1$  cDNA from *Xenopus laevis*. *Biochim Biophys Acta* 1261:439–441
58. Dyer CJ, Simmons JM, Matteri RL, Keisler DH 1997 cDNA cloning and tissue-specific gene expression of ovine leptin, NPY- $Y_1$  receptor, and NPY- $Y_2$  receptor. *Dom Anim Endocrinol* 14:295–303
59. Danger JM, Lamacz M, Mauviard F, Saint-Pierre S, Jenks BG, Tonon MC, Vaudry H 1990 Neuropeptide Y inhibits thyrotropin-releasing hormone-induced stimulation of melanotropin release from the intermediate lobe of the frog pituitary. *Gen Comp Endocrinol* 77:143–149
60. Fong HK, Yoshimoto KK, Eversole-Cire P, Simon MI 1988 Identification of a GTP-binding protein alpha subunit that lacks an apparent ADP-ribosylation site for pertussis toxin. *Proc Natl Acad Sci USA* 85:3066–3070
61. Casey PJ, Fong HK, Simon MI, Gilman AG 1990 Gz, a guanine nucleotide-binding protein with unique biochemical properties. *J Biol Chem* 265:2383–2390
62. Galas L, Lamacz M, Garnier M, Roubos EW, Tonon MC, Vaudry H 1999 Involvement of protein kinase C and protein tyrosine kinase in TRH-induced  $\alpha$ -MSH secretion from frog melanotrope cells. *Endocrinology* 140:3264–3272
63. Ohmichi M, Koike K, Nohara A, Kanda Y, Sakamoto T, Zhang ZX, Hirota K, Miyake A 1994 Dopamine inhibits TRH-induced MAP kinase activation in dispersed rat anterior pituitary cells. *Biochem Biophys Res Commun* 201:642–648
64. Gonzalez de Aguilar JL, Tonon MC, Ruiz-Navarro A, Vaudry H, Gracia-Navarro F 1994 Morphological and functional heterogeneity of frog melanotrope cells. *Neuroendocrinology* 59:176–182
65. Gonzalez de Aguilar JL, Malagon MM, Vasquez-Martinez RF, Lihmann I, Tonon MC, Vaudry H, Gracia-Navarro F 1997 Two frog melanotrope cell subpopulations exhibiting distinct biochemical and physiological patterns in basal conditions and under thyrotropin-releasing hormone stimulation. *Endocrinology* 138:970–977
66. Valentijn JA, Vaudry H, Kloas W, Cazin L 1994 Melanostatin (NPY) inhibited electrical activity in frog melanotrophs through modulation of  $K^+$ ,  $Na^+$  and  $Ca^{2+}$  currents. *J Physiol* 475:185–195
67. Scheenen WJMM, Yntema HG, Willems PHGM, Roubos EW, Lieste JR, Jenks BG 1995 Neuropeptide Y inhibits  $Ca^{2+}$  oscillations, cyclic AMP, and secretion in melanotrope cells of *Xenopus laevis* via a  $Y_1$  receptor. *Peptides* 16:889–895
68. Law GJ, Pachter JA, Dannies PS 1988 Dopamine has no effect on thyrotropin-releasing hormone mobilization of calcium from intracellular stores in rat anterior pituitary cells. *Mol Endocrinol* 2:966–972
69. Law GJ, Pachter JA, Dannies PS 1989  $Ca^{2+}$  transients induced by thyrotropin-releasing hormone rapidly lose their ability to cause release of prolactin. *Mol Endocrinol* 3:539–546

---

## CHARLES E. CULPEPER SCHOLARSHIPS IN MEDICAL SCIENCE

The Rockefeller Brothers Fund is currently accepting applications for its 2003 Charles E. Culpeper Scholarships in Medical Science Program designed to support the career development of academic physicians.

Up to four awards of \$100,000 per year for three years will be made to United States medical schools or equivalent United States educational institutions on behalf of candidates who are U.S. citizens or aliens who have been granted permanent U.S. residence (proof required); who have received their M.D. degree from a U.S. medical school or the equivalent of an M.D. degree from an educational institution equivalent to a U.S. medical school in 1994 or later (except under extraordinary circumstances, as approved by the Fund before submittal); and who are judged worthy of support by virtue of the quality of their research proposals. All scientific research relevant to human health is eligible for consideration. No institution may nominate more than one candidate.

In selecting awardees, emphasis will be on identifying young physicians with clear potential for making substantial contributions to science as academic physicians. Since January 1988, 49 physicians have been selected as Charles E. Culpeper Medical Scholars.

Deadline for applications is August 15, 2002. Awards will be announced in January 2003, for activation on or about July 1, 2003. Application forms and instructions may be obtained on the Web at [www.rbf.org](http://www.rbf.org) or by contacting the Rockefeller Brothers Fund, 437 Madison Avenue, 37th floor, New York, NY 10022-7001; telephone: 212/812-4200; fax: 212/812-4299.
